# Supplementary figures and images for: Capecitabine-Induced Ileitis during Neoadjuvant Pelvic Radio-Chemotherapy for Locally Advanced Rectal Cancer: A Case Report with Literature Review
Source: MDPI journal article supplement (doi:10.3390/curroncol30100655), 2023-10-10

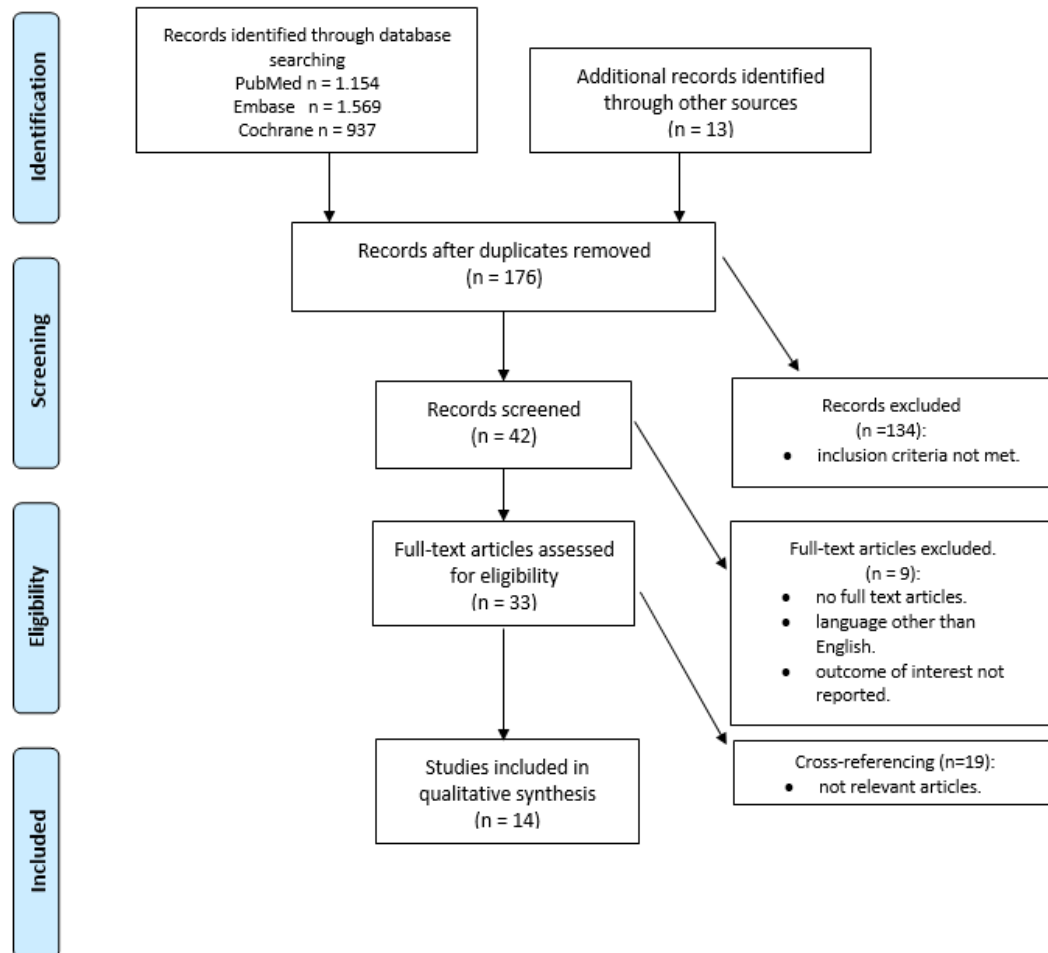

Figure S1: PRISMA workflow of the literature search and article selection process.

Supplement: s1 [file s1]
